# Supplementary material for: Identification of the minimum region of flatfish myostatin propeptide (Pep45-65) for myostatin inhibition and its potential to enhance muscle growth and performance in animals
Source: PubMed Central journal article supplement (PMC6472743; doi:10.1371/journal.pone.0215298), 2019-04-18
Supplement: pone.0215298.s001.pdf [file pone.0215298.s001.pdf]

| <b>Truncated MSTN1<br/>propeptide</b> | <b>Forward primer</b>                         | <b>Reverse primer</b>                    |
|---------------------------------------|-----------------------------------------------|------------------------------------------|
| pMAL-c5x-Pro45-70                     | TGA <u>GAA TTC</u> CCT GCA GGT                | CTT CAT TCG CAG TTT GCT C                |
| pMAL-c5x-Pro45-69                     | TGA <u>GAA TTC</u> CCT GCA GGT                | CAT TCG CAG TTT GCT CAG                  |
| pMAL-c5x-Pro45-68                     | TGA <u>GAA TTC</u> CCT GCA GGT                | TCG CAG TTT GCT CAG AAT C                |
| pMAL-c5x-Pro45-67                     | TGA <u>GAA TTC</u> CCT GCA GGT                | CAG TTT GCT CAG AAT CTG AG               |
| pMAL-c5x-Pro45-66                     | TGA <u>GAA TTC</u> CCT GCA GGT                | TTT GCT CAG AAT CTG AGA TTT              |
| pMAL-c5x-Pro45-65                     | TGA <u>GAA TTC</u> CCT GCA GGT                | GCT CAG AAT CTG AGA TTT GAT C            |
| pMAL-c5x-Pro45-64                     | TGA <u>GAA TTC</u> CCT GCA GGT                | CAG AAT CTG AGA TTT GAT CGC              |
| pMAL-c5x-Pro45-63                     | TGA <u>GAA TTC</u> CCT GCA GGT                | AAT CTG AGA TTT GAT CGC G                |
| pMAL-c5x-Pro45-62                     | TGA <u>GAA TTC</u> CCT GCA GGT                | CTG AGA TTT GAT CGC GTT TAG              |
| pMAL-c5x-Pro45-61                     | TGA <u>GAA TTC</u> CCT GCA GGT                | AGA TTT GAT CGC GTT TAG TC               |
| pMAL-c5x-Pro45-60                     | TGA <u>GAA TTC</u> CCT GCA GGT                | TTT GAT CGC GTT TAG TCG                  |
| pMAL-c5x-Pro46-70                     | GAC GTC CGG CAG CAG ATA                       | <u>GAA TTC</u> GGA TCC GTC GAC G         |
| pMAL-c5x-Pro46-69                     | GAC GTC CGG CAG CAG ATA                       | <u>GAA TTC</u> GGA TCC GTC GAC G         |
| pMAL-c5x-Pro47-70                     | GTC CGG CAG CAG ATA AAA                       | <u>GAA TTC</u> GGA TCC GTC GAC           |
| pMAL-c5x-Pro49-70                     | CAG CAG ATA AAA ACC ATG C                     | <u>GAA TTC</u> GGA TCC GTC GAC           |
| pMAL-c5x-Pro45-70-His6                | CAC CAC CAC TGA <u>GAA TTC</u><br>CCT GCA GGT | ATG ATG ATG CTT CAT TCG CAG<br>TTT GCT C |
